# Supplementary material for: Key Anti-Fibrosis Associated Long Noncoding RNAs Identified in Human Hepatic Stellate Cell via Transcriptome Sequencing Analysis
Source: MDPI journal article supplement (doi:10.3390/ijms19030675), 2018-02-27
Supplement: s1 [file s1]

**Table S3. KEGG significant pathway enrichment analysis of the DE lncRNA target genes.**

| Pathway ID | Name                     | Cluster frequency | Genome frequency of use | P-value    | Q-value   | Genes                                                                                                                                                |
|------------|--------------------------|-------------------|-------------------------|------------|-----------|------------------------------------------------------------------------------------------------------------------------------------------------------|
| ko04390    | Hippo signalling pathway | 8/109             | 314/9593                | 0.02635468 | 0.7375082 | MTCONS_00108259<br>MTCONS_00051711<br>MTCONS_00078810<br>MTCONS_00131568<br>MTCONS_00153178<br>MTCONS_00155163<br>MTCONS_00110762<br>MTCONS_00026808 |

**Table S3.** KEGG enrichment analysis showed that the DE lncRNA-targeted mRNAs were only significantly enriched in the Hippo signalling pathway.
