# Supplementary material for: Key Anti-Fibrosis Associated Long Noncoding RNAs Identified in Human Hepatic Stellate Cell via Transcriptome Sequencing Analysis
Source: Int J Mol Sci. 2018 Feb 27;19(3):675. doi: 10.3390/ijms19030675 (PMC5877536; doi:10.3390/ijms19030675)
Supplement: Supplementary file 1 [file ijms-19-00675-s001.zip]

Archive with 4 entries (4 files):
- Table S4.xlsx
- Figure Supplementary.pdf
- Table S1 and S2.xlsx
- Table S3.pdf
