# Supplementary material for: Key Anti-Fibrosis Associated Long Noncoding RNAs Identified in Human Hepatic Stellate Cell via Transcriptome Sequencing Analysis
Source: Int J Mol Sci. 2018 Feb 27;19(3):675. doi: 10.3390/ijms19030675 (PMC5877536; doi:10.3390/ijms19030675)
Supplement: Supplementary file 1 [file ijms-19-00675-s001.zip › Table S1 and S2.xlsx]

## Sheet: Sheet1
Table S1. The main features of the lncRNA library and database alignment generated by RNA-seq
Sample	TotalRawReads	TotalAverageRawReads	TotalCleanReads	TotalAverageCleanReads	TotalCleanBase	TotalCleanReadsRatio	TotalrRNAFilterReads	TotalrRNAFilterReadsRatio	GCofFq1	GCofFq2	Q20ofFq1	Q20ofFq2	Q30ofFq1	Q30ofFq2	TotalMappingRatio	TotalAverageMappingRatio	UniquelyMappingRatio	UniquelyAverageMappingRatio
VPA1	167706906	178038730	154839178	1.6466e+08	12754873000	0.92327	11400008	0.06798	0.5432	0.5446	0.9896	0.9829	0.9654	0.9544	0.7423	0.7785	0.6674	0.6859
VPA2	199562082		184783010		12732997400	0.92594	13093618	0.06561	0.5689	0.5748	0.994	0.9821	0.9797	0.9531	0.834		0.7409
VPA3	166847202		154357322		12672522000	0.92514	10197928	0.06112	0.5188	0.521	0.9933	0.9762	0.978	0.9406	0.7733		0.6993
con1	168594152	1.89957e+08	156194096	175359348	12713343800	0.92645	10518808	0.06239	0.5428	0.546	0.9936	0.9811	0.9784	0.9515	0.7908		0.6973
con2	182323020		167948146		12673022800	0.92116	12092172	0.06632	0.5747	0.5809	0.9941	0.9865	0.9796	0.9639	0.7821		0.6584
con3	218953100		201935802		12621495400	0.92228	16403190	0.07492	0.5509	0.5557	0.9941	0.984	0.9798	0.9582	0.7485		0.6519
Table S2. Identification of lncRNA and mRNA in hHSC myofibroblasts
Sample	novel_lncRNA.gene	novel_mRNA.gene	novnel_lncRNA.isoforms	novnel_mRNA.isoforms	known_lncRNA.gene	known_lncRNA.isoforms	known_mRNA.gene	known_mRNA.isoforms
con1	4164	2285	4495	2683	24128	28189	8096	9078
con2	3404	2063	3656	2362	19851	23001	7239	7923
con3	1633	943	1751	1014	10274	11500	3124	3293
VPA1	4138	2081	4444	2400	23237	27012	7302	8044
VPA2	4121	2143	4435	2485	22872	26680	7366	8146
VPA3	4398	2162	4752	2524	24455	28634	7483	8331
Average	3643	1946.17	3922.17	2244.67	20802.8	24169.3	6768.33	7469.17
