# Supplementary material for: Key Anti-Fibrosis Associated Long Noncoding RNAs Identified in Human Hepatic Stellate Cell via Transcriptome Sequencing Analysis
Source: Int J Mol Sci. 2018 Feb 27;19(3):675. doi: 10.3390/ijms19030675 (PMC5877536; doi:10.3390/ijms19030675)
Supplement: Supplementary file 1 [file ijms-19-00675-s001.zip › Table S4.xlsx]

## Sheet: Sheet1
Table S4.Possible hepatic fibrosis related genes were significantly enriched in GO and KEGG and their coexpression of lncRN
GeneID(mRNA)	Up-Down-Regulation(VPA/con)	Chromosomal location	p-value	q-value(Storey et al. 2003)	Co-expression lncRNAs	log2Ratio(VPA/con)	Up-Down-Regulation(VPA/con)	lncRNA_chr	p-value	q-value(Storey et al. 2003)	lncRNA_class	distance	Overlap_class	lncRNA_chain	mRNA_chain	Pearson_correlation
MTCONS_00083804	Up	chr19	2.72e-99	1.99e-97	NONHSAT194173.1	1.07744	Up	chr3	8.42e-73	4.44e-71	tran	NA	NA	+	+	0.995
Hist1h2ak	Down	chr6	0.000102578	0.000391601	LTCONS_00161292	1.62721	Up	chr6	1.68e-05	7.61e-05	cis_mRNA_dw20k	2240	NA	.	-	-0.6806
Hist1h3f	Down	chr6	6.26e-05	0.000251157	LTCONS_00157056	-1.30763	Down	chr6	0	0	cis_mRNA_overlap	0	mRNA-CompleteIn-LncIntron	-	-	0.9235
					LTCONS_00157063	-1.69089	Down	chr6	1.04e-158	1.13e-156	cis_mRNA_overlap	0	mRNA-CompleteIn-LncIntron	-	-	0.9388
					NONHSAT208905.1	-1.32658	Down	chr6	0	0	cis_mRNA_up10k	1004	NA	-	-	0.9366
					LTCONS_00157056	-1.30763	Down	chr6	0	0	cis_mRNA_overlap	0	mRNA-CompleteIn-LncIntron	-	-	0.9235
HIST1H1E	Down	chr6	6.41e-96	4.49e-94	LTCONS_00157056	-1.30763	Down	chr6	0	0	cis_mRNA_dw20k	1229	NA	-	+	0.9797
Hist1h2bk	Up	chr6	3.74e-06	1.9e-05	LTCONS_00017205	-1.17227	Down	chr1	0	0	tran	NA	NA	.	-	-0.8744
					LTCONS_00157056	-1.30763	Down	chr6	0	0	tran	853788	NA	-	-	-0.9291
					LTCONS_00157063	-1.69089	Down	chr6	1.04e-158	1.13e-156	tran	853788	NA	-	-	-0.9043
					LTCONS_00004941	-1.17597	Down	chr1	0	0	tran	NA	NA	+	-	-0.9388
hist1h3g	Down	chr6	1.68e-06	8.96e-06	LTCONS_00157056	-1.30763	Down	chr6	0	0	cis_mRNA_dw20k	18862	NA	-	-	0.9468
					LTCONS_00157063	-1.69089	Down	chr6	1.04e-158	1.13e-156	cis_mRNA_dw20k	18862	NA	-	-	0.8589
					NONHSAT208905.1	-1.32658	Down	chr6	0	0	cis_mRNA_dw20k	17863	NA	-	-	0.9312
CALD1	Down	chr7	3.64e-06	1.85e-05	NONHSAT214020.1	2.26429	Up	chr7	0	0	cis_mRNA_overlap	0	Lnc-AntiCompleteIn-mRNAExon	-	+	-0.6474
				1.85e-05	NONHSAT214019.1	1.93319	Up	chr7	5.21e-07	3.01e-06	cis_mRNA_up10k	6779	NA	-	+	-0.6686
TGFB2	Up	chr7	9.65e-12	9.15e-11	NONHSAT214019.1	1.93319	Up	chr7	5.21e-07	3.01e-06	cis_mRNA_overlap	0	Lnc-AntiCompleteIn-mRNAIntron	-	+	0.9838
					NONHSAT123474.2	2.1597	Up	chr7	1.48e-24	2.84e-23	cis_mRNA_overlap	0	Lnc-AntiCompleteIn-mRNAIntron	-	+	0.9707
					NONHSAT214020.1	2.26429	Up	chr7	0	0	cis_mRNA_overlap	0	Lnc-AntiCompleteIn-mRNAExon	-	+	0.9633
MTCONS_00166153	Up	chr7	1.33e-10	1.16e-09	NONHSAT214020.1	2.26429	Up	chr7	0	0	cis_mRNA_overlap	0	Lnc-AntiCompleteIn-mRNAExon	-	+	0.7015
					NONHSAT214019.1	1.93319	Up	chr7	5.21e-07	3.01e-06	cis_mRNA_overlap	0	Lnc-AntiCompleteIn-mRNAIntron	-	+	0.6146
ACTB	Down	chr7	1.82e-06	9.65e-06	NONHSAT211603.1	-5.76126	Down	chr7	2.22e-07	1.35e-06	cis_mRNA_dw20k	1606	NA	+	-	0.6106
			1.82e-06		NONHSAT211602.1	1.54867	Up	chr7	6.63e-27	1.38e-25	cis_mRNA_dw20k	1604	NA	+	-	-0.7517
A2M	Up	chr12	2.75e-06	1.42e-05	NONHSAT026380.2	6.15803	Up	chr12	7.06e-11	6.31e-10	cis_mRNA_dw20k	2639	NA	-	-	0.9637
MTCONS_00167752	Up	chr7	3.16e-32	7.7e-31	NONHSAT119619.2	2.60035	Up	chr7	5.48e-75	2.99e-73	cis_mRNA_dw20k	2331	NA	-	-	0.9387
					NONHSAT119618.2	1.76328	Up	chr7	1.5e-10	1.3e-09	cis_mRNA_dw20k	1799	NA	-	-	0.8772
MTCONS_00158854	Up	chr6	8.26e-06	3.94e-05	NONHSAT113677.2	1.29378	Up	chr6	8.93e-10	7.21e-09	cis_mRNA_overlap	0	Lnc-AntiOverlap-mRNA	+	-	0.9531
PZP	Up	chr12	6.4e-40	1.88e-38	NONHSAT026391.2	2.34565	Up	chr12	9.34e-17	1.24e-15	cis_mRNA_overlap	0	Lnc-CompleteIn-mRNAIntron	-	-	0.9381
FGFR2	Up	chr10	3.77e-06	1.91e-05	NONHSAT158555.1	3.32912	Up	chr10	0.000175775	0.000636487	cis_mRNA_dw20k	10927	NA	.	-	0.7655
RELL2	Up	chr5	5.59e-08	3.67e-07	NONHSAT104271.2	1.1745	Up	chr5	2.79e-05	0.000120352	cis_mRNA_overlap	0	Lnc-AntiOverlap-mRNA	-	+	0.9036
TGFB2	Up	chr1	0.000224515	0.000791735	NONHSAT009518.2	2.44604	Up	chr1	6.19e-247	1.03e-244	cis_mRNA_overlap	0	Lnc-AntiOverlap-mRNA	-	+	0.9115
IGFBP7	Up	chr4	6.71e-11	6.01e-10	NONHSAT096544.2	1.80482	Up	chr4	0	0	cis_mRNA_overlap	0	Lnc-AntiOverlap-mRNA	+	-	0.956
CTGF	Up	chr6	6.85e-05	0.000272755	NONHSAT208034.1	1.69167	Up	chr6	6.35e-138	6.19e-136	cis_mRNA_overlap	0	Lnc-AntiOverlap-mRNA	+	-	0.8812
NTN4	Up	chr12	3.32e-09	2.52e-08	LTCONS_00038568	2.34325	Up	chr12	1.15e-14	1.35e-13	cis_mRNA_dw20k	6678	NA	+	-	0.8797
					LTCONS_00044996	5.57849	Up	chr12	1.43e-51	5.45e-50	cis_mRNA_dw20k	3219	NA	.	-	0.9053
PCSK6	Up	chr15	6.43e-05	0.000257283	NONHSAT172067.1	2.25433	Up	chr15	2.36e-05	0.000103461	cis_mRNA_dw20k	2281	NA	-	-	0.6457
	Up	chr15	2.37e-08	1.63e-07	NONHSAT041765.2	2.32578	Up	chr15	3.85e-85	2.44e-83	cis_mRNA_overlap	0	Lnc-AntiOverlap-mRNA	-	+	0.8589
					NONHSAT171491.1	2.34422	Up	chr15	0	0	cis_mRNA_overlap	0	Lnc-AntiOverlap-mRNA	-	+	0.8602
FGF2	Up	chr6	9.23e-149	9.58e-147	NONHSAT200340.1	1.16423	Up	chr4	1.11e-12	1.14e-11	cis_mRNA_overlap	0	Lnc-AntiCompleteIn-mRNAIntron	-	+
MTCONS_00153178	Up	chr6	1.35494e-14	1.5813e-13	NONHSAT113482.2	2.85631	Up	chr6	3.37822e-80	1.9739e-78	cis_mRNA_dw20k	5114	NA	-	+	0.8668
					NONHSAT113476.2	3.14331	Up	chr6	1.95045e-162	2.1972e-160	cis_mRNA_overlap	0	Lnc-AntiOverlap-mRNA	-	+	0.864
					NONHSAT209290.1	2.657	Up	chr6	6.7423e-15	8.02367e-14	cis_mRNA_overlap	0	mRNA-AntiCompleteIn-LncIntron	-	+	0.9896
MTCONS_00155163	Down	chr6	0.000151194	0.000556808	NONHSAT167431.1	2.8547	Up	chr13	2.18139e-05	9.61755e-05	tran	NA	NA	.	+	-0.6462
MTCONS_00110762	Up	chr20	2.00092e-39	5.81375e-38	NONHSAT079785.2	2.18617	Up	chr20	5.61547e-05	0.000227171	cis_mRNA_overlap	0	Lnc-AntiCompleteIn-mRNAIntron	+	-	0.7641
MTCONS_00026808	Up	chr11	5.19605e-06	2.57773e-05	NONHSAT160089.1	1.18521	Up	chr11	5.9458e-50	2.18938e-48	cis_mRNA_overlap	0	Lnc-AntiOverlap-mRNA	-	+	0.8678
					NONHSAT114867.2	2.15301	Up	chr6	5.24387e-06	2.59854e-05	tran	NA	NA	+	+	0.9319
MTCONS_00051711	Up	chr14	1.13959e-06	6.23648e-06	NONHSAT036856.2	3.18186	Up	chr14	1.12922e-22	1.98421e-21	cis_mRNA_up10k	115	NA	-	+	0.6493
MTCONS_00078810	Up	chr17	9.44983e-22	1.60428e-20	NONHSAT176684.1	2.00541	Up	chr17	1.0717e-08	7.67558e-08	cis_mRNA_up10k	3832	NA	-	.	0.9012
MTCONS_00131568	Down	chr4	0.000276678	0.000954539	NONHSAT183716.1	-1.558	Down	chr2	0.000149991	0.000552685	tran	NA	NA	+	+	0.8996
